# Supplementary material for: Stevia residue extract increases intestinal uric acid excretionviainteractions with intestinal urate transporters in hyperuricemic mice
Source: Royal Society of Chemistry journal article supplement (doi:10.1039/c9fo02032b), 2019-01-01
Supplement: c9fo02032b1.pdf [file c9fo02032b1.pdf]

**1 Stevia residue extract increases intestinal uric acid excretion via interacting with**  
**2 intestinal urate transporters in hyperuricemic mice**

3 Arshad Mehmood<sup>1 2</sup>, Lei Zhao<sup>1 2 \*</sup>, Chengtao Wang<sup>1 2 \*</sup>, Imam Hossen<sup>1 2</sup>, Rifat  
4 Nowshin Raka<sup>12</sup>, Huimin Zhang<sup>1 2</sup>

5 <sup>1</sup> Beijing Advance Innovation Center for Food Nutrition and Human Health, Beijing  
6 Technology and Business University, Beijing 100048, China

7 <sup>2</sup> Beijing Engineering and Technology Research Center of Food Additives, School of  
8 Food and Chemical Technology, Beijing Technology and Business University,  
9 Beijing 100048, China

10  
11  
12  
13  
14  
15  
16  
17  
18  
19  
20  
21  
22  
23  
24  
25  
26  
27  
28  
29  
30  
31  
32  
33  
34  
35

### 36 **Preparation of STVRE**

37 The Stevia leaves powder was extracted twice with 18 volumes of distilled water at  
38 65°C for 1.5 hr and then filtrated. The filtrate was mixed with ferrous sulfate (0.9%  
39 w/v, final concentration) and adjusted to pH 9.0–10.0 with calcium hydroxide. After  
40 flocculation at 50°C for 30 min, the mixture was filtrated to obtain the Stevia residue.  
41 The Stevia residue was then extracted three times with acidified 95% (v/v) acetone  
42 (pH 1.5) at 45°C for 1 hr and filtrated. The filtrate was evaporated under reduced  
43 pressure to remove acetone, and thereafter purified by extraction with ethyl acetate.  
44 The partially purified extract was applied to an HZ841 macroporous resin column,  
45 and then eluted it with 2 bed volume (BV) of distilled water, followed by 2 BV of  
46 alkaline water (pH 9.5) at a flow rate of 1 BV/hr to remove impurities. Subsequently,  
47 the adsorbed components were eluted with 3 BV of 17% (v/v) ethanol, followed by  
48 1.5 BV of 50% (v/v) ethanol. The eluents were concentrated and lyophilized to obtain  
49 SRE1 and SRE2, respectively. The resulting STVRE powder was stored at  
50 -20°C prior to use (1, 2).

### 51 **Qualitative and quantitative analysis of the major bioactive compounds in SREs**

52 The major bioactive compounds in SREs were identified by HPLC–ESI–QTOF–  
53 MS/MS (6530 HPLC-MS system; Aglient Technologies, Santa Clara, CA, USA) and  
54 quantified by HPLC (1290 HPLC system; Aglient Technologies, Santa Clara, CA,  
55 USA). The HPLC parameters were as follows: chromatographic column, Agilent  
56 Eclipse Plus C18 column (50 mm × 2.1 mm i.d., 1.8 μm; Aglient Technologies, Santa  
57 Clara, CA, USA); mobile phase, 0.1% formic acid in water (A) and methanol (B);  
58 flow rate, 0.1 mL/min; elution procedure, 0–10 min, 10%–50% B; 10–12 min, 50%–

59 10% B; 12–15 min, 10% B; detection wavelength, 320 and 360 nm; column  
60 temperature, 30°C; volume of sample injection, 1  $\mu$ L. Authentic compounds  
61 (3-O-caffeoylquinic acid, 4-O-caffeoylquinic acid, caffeic acid, quercetin,  
62 3,4-O-dicaffeoylquinic acid, 3,5-O-dicaffeoylquinic acid, 4,5-O-di-caffeoylquinic  
63 acid and quercetin-3-O-rhamnoside) were dissolved in methanol; the concentrations  
64 were adjusted to 6.25, 12.5, 25, 50, 100, 200 and 400  $\mu$ g/mL, respectively, and the  
65 calibration curves were established under the same determination conditions. Mass  
66 spectrometric detection was set as follows: Negative ion mass spectra of the column  
67 eluate were recorded in the range of m/z 100–1500 (1, 2).

68

69

70

71 **Supplementary Table 1.** Retention times (Rt), MS and MS2 fragmentation ions of  
 72 the phenolic compounds in Stevia residue extract (STVRE).

73

| Compounds                      | Rt (min) | Pseudomolecular ion [M-H] <sup>-</sup> (m/z) | MS2 (m/z)                                                                             | Tentative identification    | mg/ml          |
|--------------------------------|----------|----------------------------------------------|---------------------------------------------------------------------------------------|-----------------------------|----------------|
| 1                              | 3.8      | 353.0878                                     | 191.0571 (100), 179.0357 (72), 135.0451 (9)                                           | 3-O-Caffeoylquinic acid     | 1.68 ± 0.75    |
| 2                              | 4.2      | 353.0878                                     | 191.0567 (100), 179.0353 (76), 173.0431 (4), 135.0442 (13)                            | 4-O-Caffeoylquinic acid     | 3.79 ± 0.41    |
| 3                              | 4.4      | 179.0350                                     | 135.0456 (100)                                                                        | Caffeic acid                | 8.54 ± 0.82    |
| 4                              | 7.9      | 515.1195                                     | 353.0916 (100), 335.0823 (1), 191.0575 (12), 179.0361 (9), 135.0443 (2)               | 3,4-O-Dicaffeoylquinic acid | 232.75 ± 2.17  |
| 5                              | 8.0      | 515.1195                                     | 353.0914 (100), 335.0771 (1), 191.0564 (5), 179.036 (14), 173.0467 (24), 135.0440 (2) | 3,5-O-Dicaffeoylquinic acid | 92.43 ± 0.97   |
| 6                              | 9.1      | 515.1195                                     | 353.0921 (100), 191.0587 (4), 179.0365 (21), 173.0462 (19), 135.0459 (2)              | 4,5-O-Dicaffeoylquinic acid | 265.94 ± 2.63  |
| 7                              | 9.3      | 447.0933                                     | 301.0373 (100)                                                                        | Quercetin-3-O-rhamnoside    | 125.97 ± 1.13  |
| 8                              | 11.0     | 301.0354                                     | 107.0139 (8), 121.0301 (11), 151.0042 (100), 178.9994 (72)                            | Quercetin                   | 3.05 ± 0.63    |
| <b>Total chlorogenic acids</b> |          |                                              |                                                                                       |                             | 605.13 ± 5.66  |
| <b>Total flavonoids</b>        |          |                                              |                                                                                       |                             | 129.02 ± 20.61 |

74

75 Adopted from (1 and 2) with permission Wiley publisher

76

77

78

79

80

81

82

83

84

85 **Supplementary Table 2. List of primer sequences uses in this study**

86

| Gene Name | forward              | reverse               |
|-----------|----------------------|-----------------------|
| ABCG2     | TAAATGGAGCACCTCAACCT | GAGATGCCACGGATAAACTG  |
| GLUT9     | GAGATGCTCATTGTGGGACG | GTGCTACTTCGTCCTCGGT   |
| GAPDH     | GTGAAGGTCGGTGTGAACGG | GTGATGGCATGGACTGTGGTC |

87

88 **Supplementary Table 3. Effect of STVRE on body weight of fructose-PO-YE**  
 89 **induced hyperuricemic mice (n = 8)**

| Treatments groups | Body Weight (g) |
|-------------------|-----------------|
| GN                | 52.23 ± 2.35    |
| GB                | 49.86 ± 4.56    |
| GM                | 50.56 ± 1.93    |
| GS1               | 51.53 ± 3.57    |
| GS2               | 50.08 ± 2.98    |

90

91 GN: normal group, GM: model group, GB: benzbromarone group (20 mg/kg bw),

92 GS1: stevia residue extract (200 mg/kg bw) and GS2: stevia residue extract (400

93 mg/kg bw)

94 #*p*<0.05, ##*p*<0.01, ###*p*<0.001 compare with GM, \**p*<0.05, \*\**p*<0.01, \*\*\**p*<0.001

95 compare with GN

96

97 1. L. Zhao, X. Wang, M. Xu, Y. Lian, C. Wang, H. Yang, A. Mehmood, Dietary

98 intervention with Stevia residue extracts alleviates impaired glucose regulation

99 in mice. J Food Biochem, 2018, 42, e12651.

100 2. L. Zhao, H. Yang, M. Xu, X. Wang, C. Wang, Y. Lian, *Stevia* residue extract  
101 ameliorates oxidative stress in d-galactose-induced aging mice via  
102 Akt/Nrf2/HO-1 pathway. *J Funct Foods*, 2019, 52, 587-595.  
103
